# Supplementary material
Source: publisher figshare collection journal article supplement (https://acs.figshare.com/ndownloader/files/25005674)
Supplement: Supplementary file 1 [file 25005674]

Supplementary information for:

Photocatalytic reduction Cr (VI) on 3.0%-Au/Sr<sub>0.70</sub>Ce<sub>0.20</sub>WO<sub>4</sub> photocatalyst

*Jia Yang, Mingyan Fu, Mingdan Tan, Yanling Tian, Xiaorui Sun,\* Huisheng Huang\**

Chongqing Key Laboratory of Inorganic Special Functional Materials, College of Chemistry

and Chemical Engineering, Yangtze Normal University, Fuling, Chongqing 408100, P. R. China

\* Email: sunxiaoruiyznu@163.com; Tel: +86-18883876787.

\* Email: h.s.huang@hotmail.com; Tel: +86-13658279645.

Table S1. A summary of the Cr (VI) reduction activities of the prepared photocatalysts in this paper.

|           | Formula                                                          | $k$ (min <sup>-1</sup> ) | pH       |
|-----------|------------------------------------------------------------------|--------------------------|----------|
| 1         | SrWO <sub>4</sub>                                                | 0.000 6 (0.6)            | 7        |
| 2         | Sr <sub>0.94</sub> Ce <sub>0.04</sub> WO <sub>4</sub>            | 0.000 8 (0.4)            | 7        |
| 3         | Sr <sub>0.88</sub> Ce <sub>0.08</sub> WO <sub>4</sub>            | 0.001 3 (3)              | 7        |
| 4         | Sr <sub>0.82</sub> Ce <sub>0.12</sub> WO <sub>4</sub>            | 0.001 7 (2)              | 7        |
| 5         | Sr <sub>0.76</sub> Ce <sub>0.16</sub> WO <sub>4</sub>            | 0.001 9 (1)              | 7        |
| 6         | Sr <sub>0.70</sub> Ce <sub>0.20</sub> WO <sub>4</sub>            | 0.040 2 (73)             | 1        |
| 7         | Sr <sub>0.70</sub> Ce <sub>0.20</sub> WO <sub>4</sub>            | 0.024 7 (35)             | 4        |
| 8         | Sr <sub>0.70</sub> Ce <sub>0.20</sub> WO <sub>4</sub>            | 0.002 1 (0.5)            | 7        |
| 9         | Sr <sub>0.64</sub> Ce <sub>0.24</sub> WO <sub>4</sub>            | 0.001 9 (1)              | 7        |
| 10        | 3.0%-Cu/ Sr <sub>0.70</sub> Ce <sub>0.20</sub> WO <sub>4</sub>   | 0.001 4 (1)              | 7        |
| <b>11</b> | <b>3.0%-Ag/ Sr<sub>0.70</sub>Ce<sub>0.20</sub>WO<sub>4</sub></b> | <b>0.003 9 (1)</b>       | <b>7</b> |
| 12        | 3.0%-Au/ Sr <sub>0.70</sub> Ce <sub>0.20</sub> WO <sub>4</sub>   | 0.003 0 (1)              | 7        |
| 13        | 3.0%-Pt/ Sr <sub>0.70</sub> Ce <sub>0.20</sub> WO <sub>4</sub>   | 0.002 7 (3)              | 7        |
| 14        | 1.0%-Au/ Sr <sub>0.70</sub> Ce <sub>0.20</sub> WO <sub>4</sub>   | 0.002 1 (0.6)            | 7        |
| 15        | 2.0%-Au/ Sr <sub>0.70</sub> Ce <sub>0.20</sub> WO <sub>4</sub>   | 0.002 7 (3)              | 7        |
| 16        | 4.0%-Au/ Sr <sub>0.70</sub> Ce <sub>0.20</sub> WO <sub>4</sub>   | 0.002 7 (3)              | 7        |

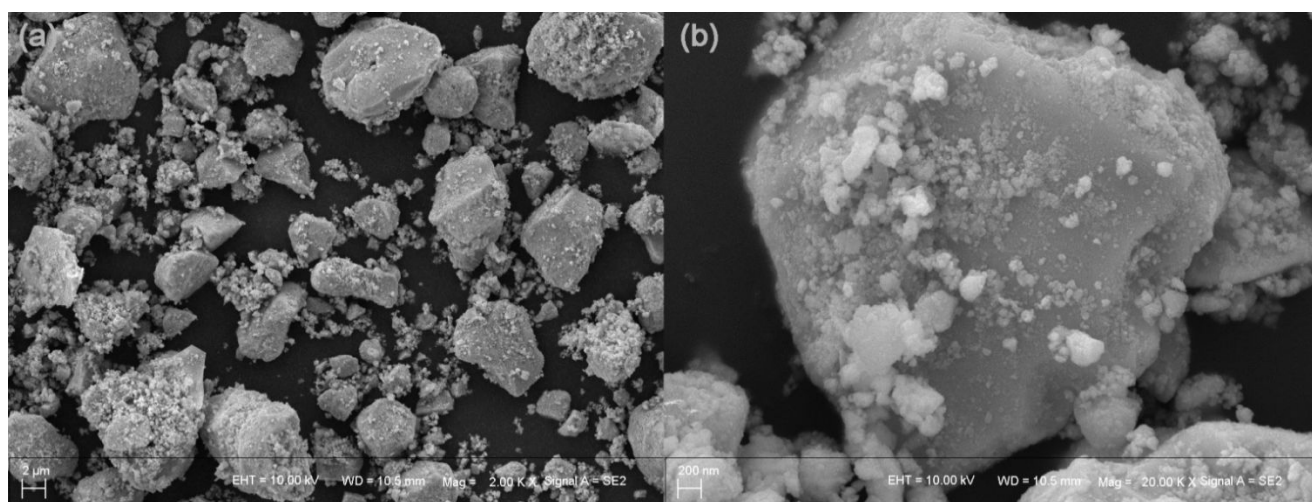

Figure S1. The SEM images of 3.0%Au/Sr<sub>0.70</sub>Ce<sub>0.20</sub>WO<sub>4</sub> sample before photocatalysis: (a) in 2 μm view; (b) in 200 nm view.

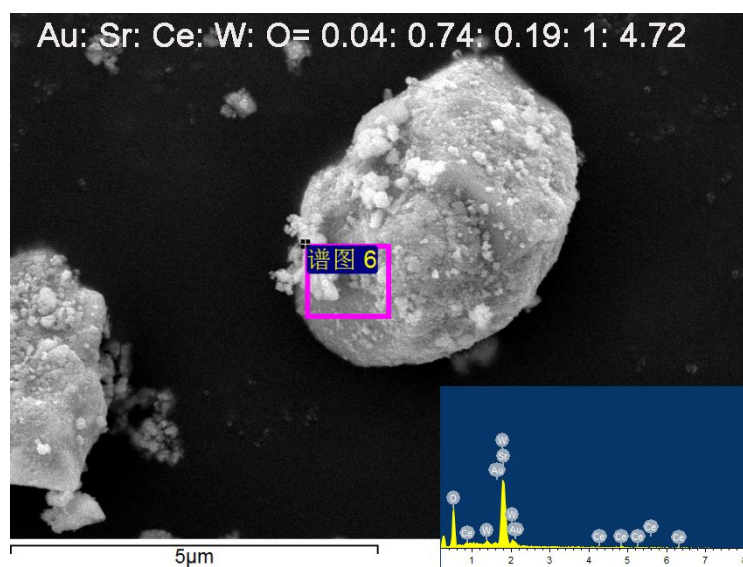

Figure S2. The EDS image of 3.0%Au/Sr<sub>0.70</sub>Ce<sub>0.20</sub>WO<sub>4</sub> sample.

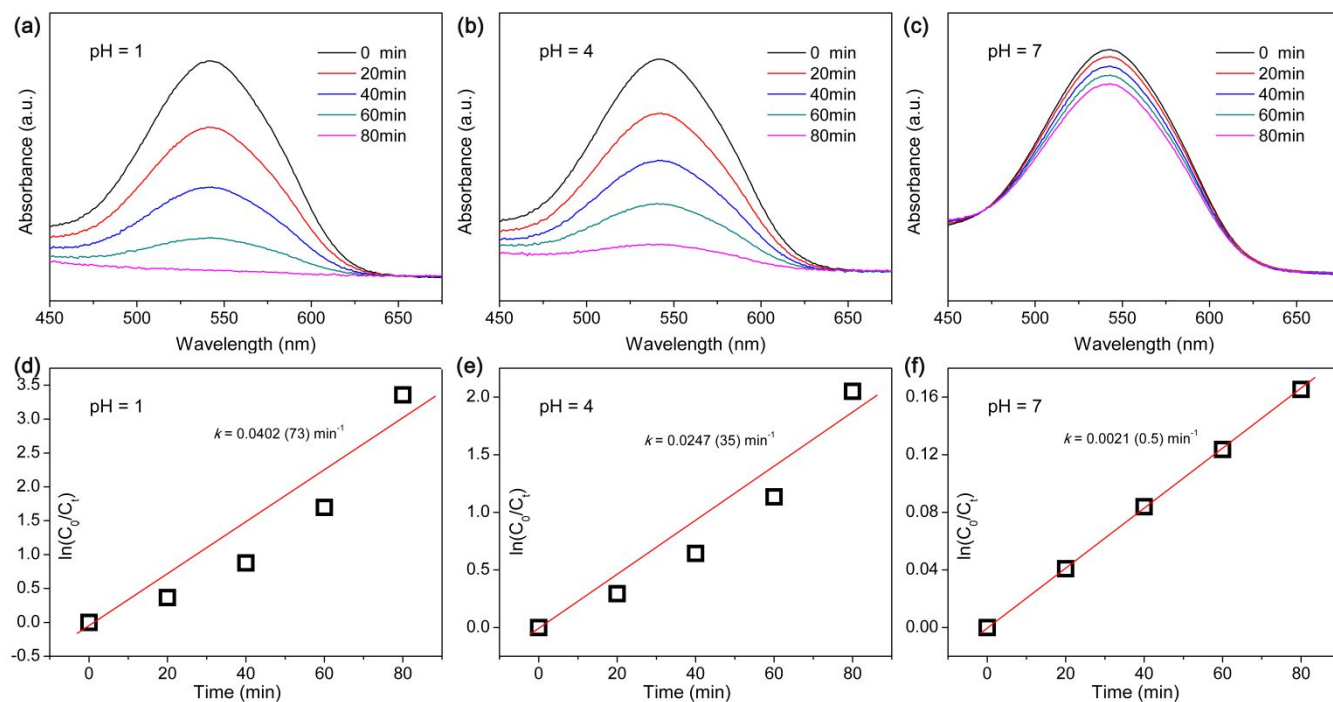

Figure S3. The absorbance of Cr (VI) solution with different concentrations over  $\text{Sr}_{0.70}\text{Ce}_{0.20}\text{WO}_4$  photocatalyst at (a) pH=1, (b) pH=4, and (c) pH=7; (b) The corresponding photocatalytic reduction activities of  $\text{Sr}_{1-1.5x}\text{Ce}_x\text{WO}_4$  at different pH values: (d) pH=1, (e) pH=4, and (f) pH=7. \*Photocatalytic conditions: 100 mg photocatalyst, 250 mL solution,  $\text{Cr}_2\text{O}_7^{2-}$  10 ppm, 300 W long-arc xenon lamp.

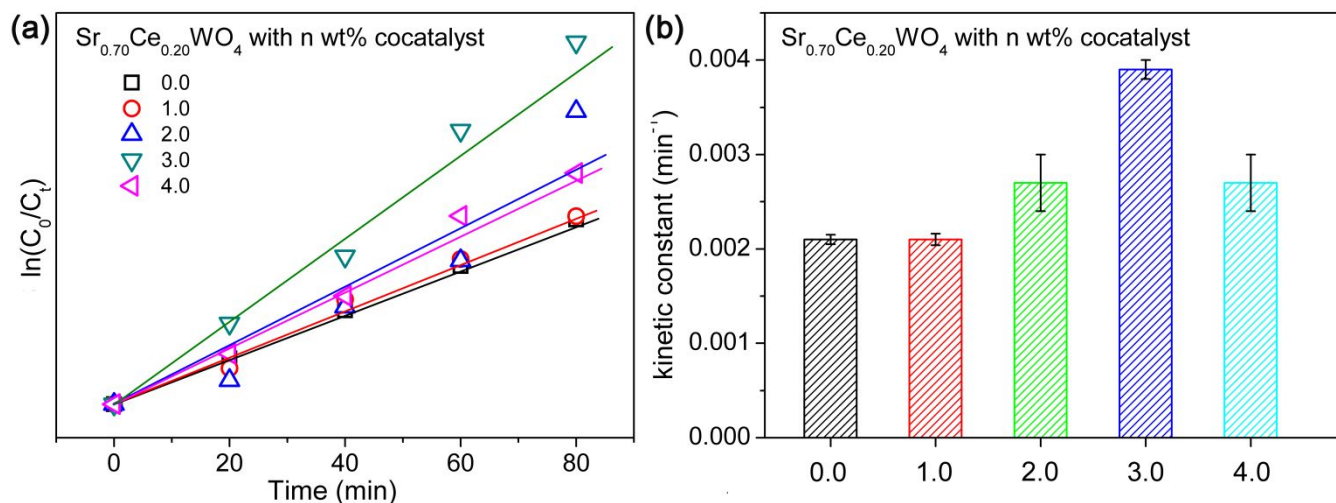

Figure S4. (a) The photocatalytic reduction activities of  $\text{Sr}_{0.70}\text{Ce}_{0.20}\text{WO}_4$  with different amounts of Au-cocatalyst against times; (b) The First-order kinetic constants of photocatalytic Cr(VI) reduction over  $\text{Sr}_{0.70}\text{Ce}_{0.20}\text{WO}_4$  with different amount of Au-cocatalyst under simulated sunlight irradiation. \*Photocatalytic conditions: 100 mg photocatalyst, 250 mL solution,  $\text{Cr}_2\text{O}_7^{2-}$  10 ppm, pH=7, 300 W long-arc xenon lamp.

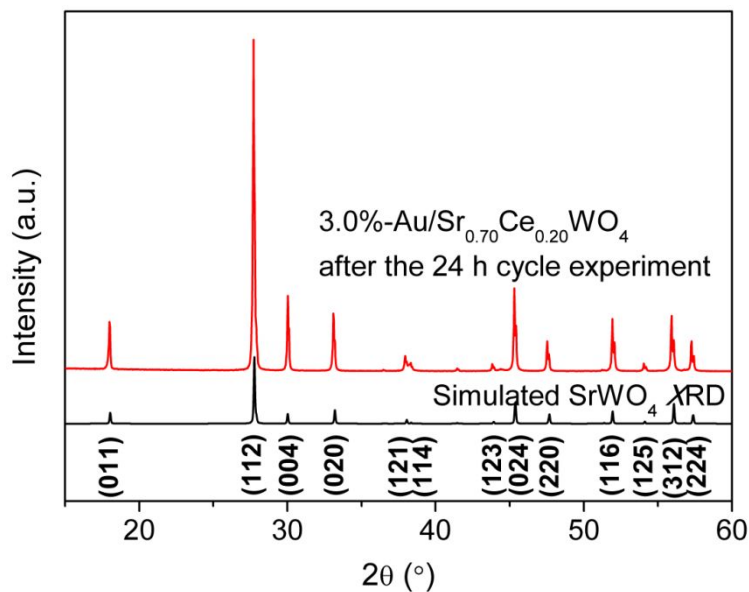

Figure S5. The XRD pattern of 3.0%-Au/Sr<sub>0.70</sub>Ce<sub>0.20</sub>WO<sub>4</sub> sample which after the cyclic experiment.

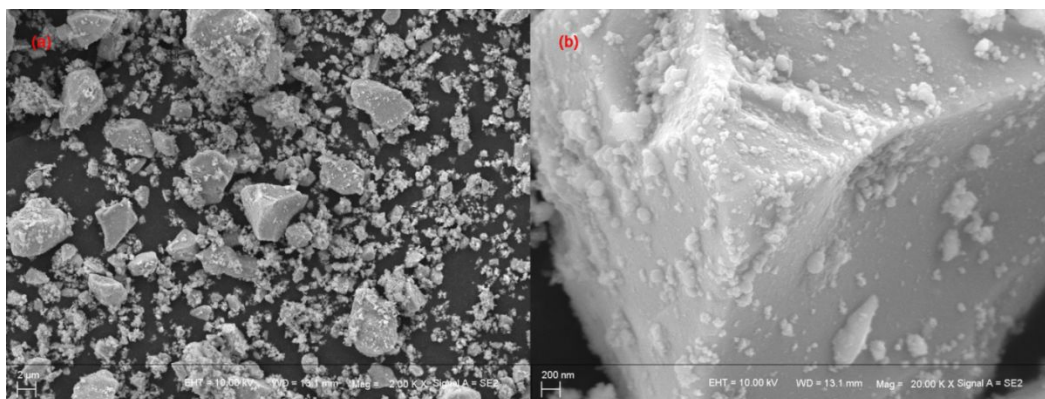

Figure S6. The SEM images of 3.0%-Au/Sr<sub>0.70</sub>Ce<sub>0.20</sub>WO<sub>4</sub> sample after photocatalysis: (a) in 2  $\mu$  m view; (b) in 200 nm view.

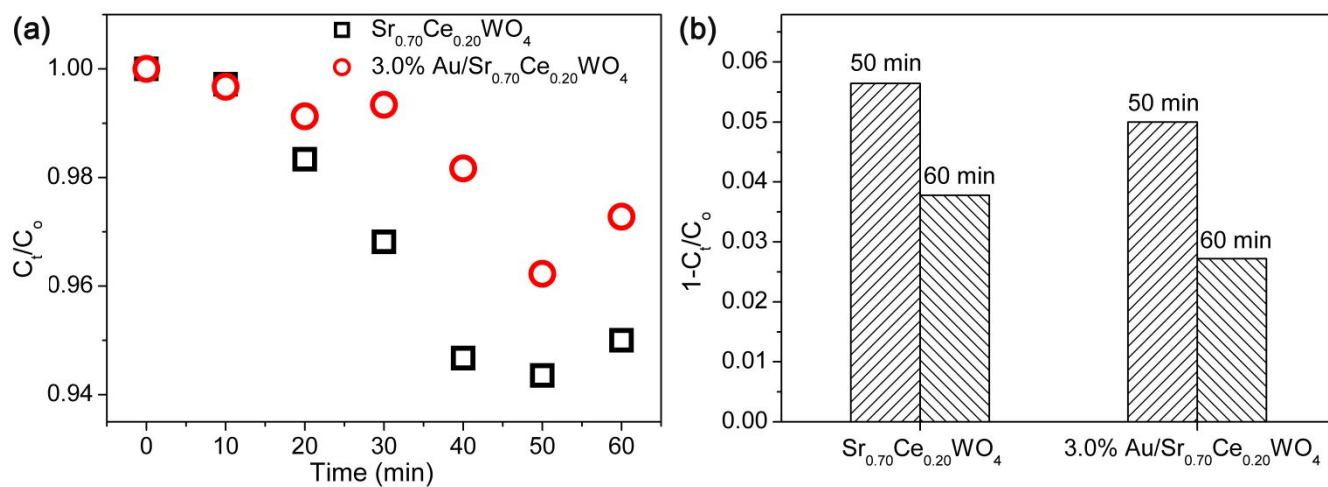

Figure S7. (a) The adsorption-desorption experiment on the Sr<sub>0.70</sub>Ce<sub>0.20</sub>WO<sub>4</sub> and 3.0%-Au/Sr<sub>0.70</sub>Ce<sub>0.20</sub>WO<sub>4</sub> samples; (b) The adsorption performances of the Sr<sub>0.70</sub>Ce<sub>0.20</sub>WO<sub>4</sub> and 3.0%-Au/Sr<sub>0.70</sub>Ce<sub>0.20</sub>WO<sub>4</sub> samples.
